# Supplementary material for: Plasma-assisted synthesis and pressure-induced structural transition of single-crystalline SnSe nanosheets
Source: Royal Society of Chemistry journal article supplement (doi:10.1039/c5nr02131f), 2015-01-01
Supplement: c5nr02131f1.pdf [file c5nr02131f1.pdf]

Electronic Supplementary Information (ESI)

## **Plasma-Assisted Synthesis and Pressure-Induced Structural Transition of Single-Crystalline SnSe Nanosheets**

**Jian zhang,<sup>a</sup> Hongyang Zhu,<sup>a</sup> Xiaoxin Wu,<sup>a</sup> Hang Cui,<sup>c</sup> Dongmei Li,<sup>a</sup> Junru Jiang,<sup>a</sup> Chunxiao Gao,<sup>a</sup> Qiushi Wang<sup>\*b</sup> and Qiliang Cui<sup>\*\*a</sup>**

<sup>a</sup> State Key Laboratory of Superhard Materials, Jilin University, Changchun 130012, Jilin, China

<sup>b</sup> College of New Energy, Bohai University, JinZhou 121013, Liaoning, China

<sup>c</sup> College of Physics, Jilin University, Changchun 130012, Jilin, China

<sup>\*a</sup>E-mail: cql@jlu.edu.cn Tel: 86-431-85168346. Fax: 86-431-85168346.

<sup>\*b</sup>E-mail: wang\_jiu\_jiu@foxmail.com

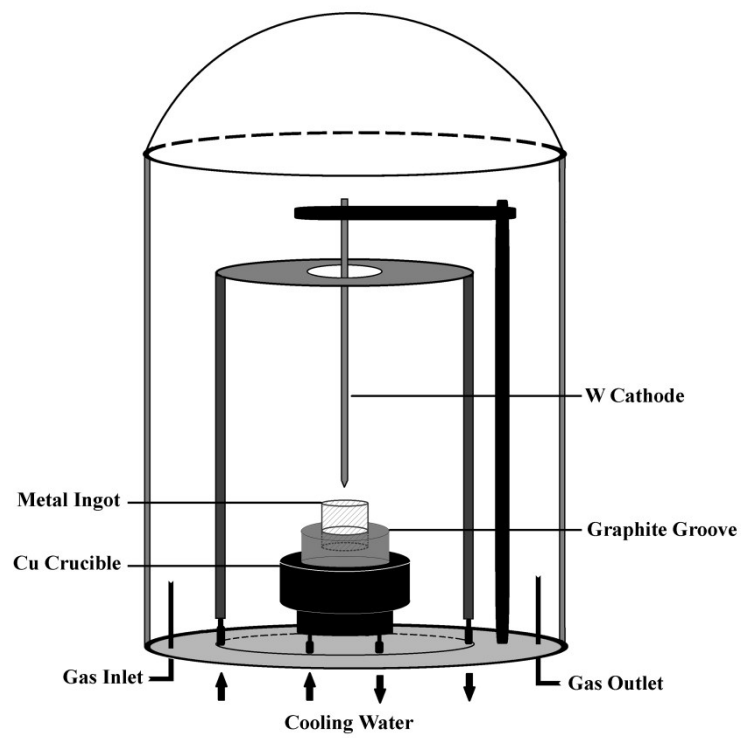

Fig. S1 Experimental set-up diagram.

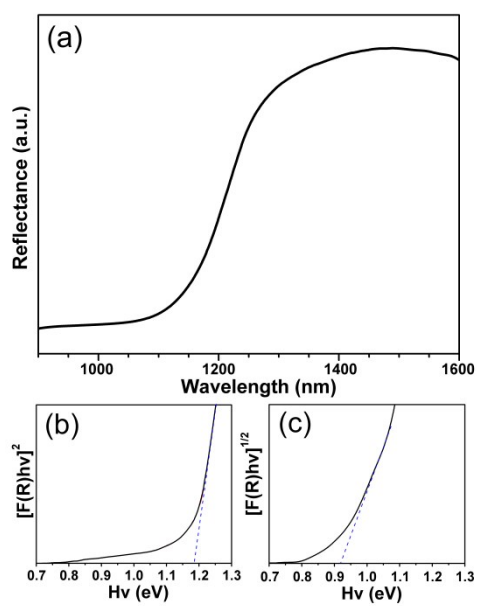

Fig. S2 UV-vis diffuse reflectance spectrum of SnSe NSs (a). Direct (b) and indirect (c) band gaps were determined from plots of  $[F(R)hv]^2$  and  $[F(R)hv]^{1/2}$  vs photon energy ( $h\nu$ ), respectively.

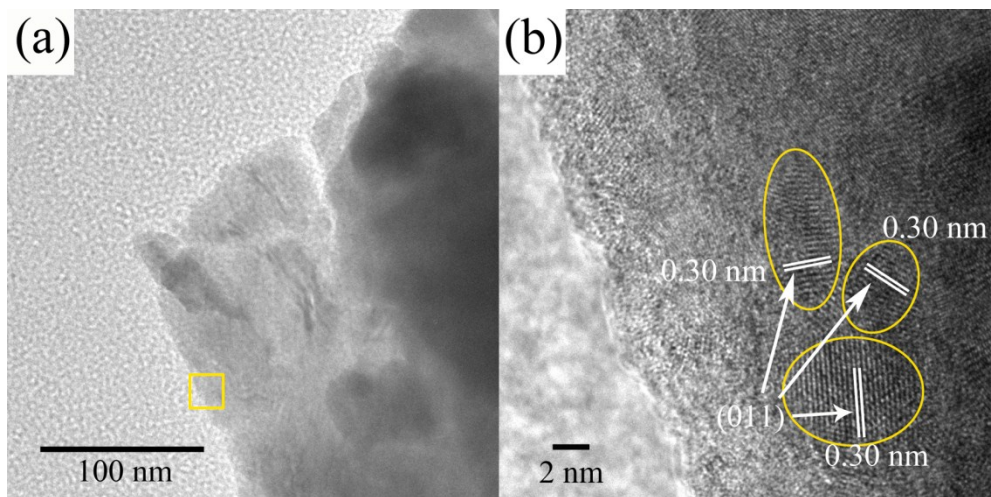

Fig. S3 TEM (a) and HRTEM (b) images of SnSe NSs after being released to ambient pressure.
